# Supplementary material for: Lactobacillus paracasei-derived extracellular vesicles attenuate the intestinal inflammatory response by augmenting the endoplasmic reticulum stress pathway
Source: PubMed Central journal article supplement (PMC7156483; doi:10.1038/s12276-019-0359-3), 2020-03-02

**Supplementary Table 1. Mouse primers of cytokines**

|                | Forward primer            | Reverse primer       |
|----------------|---------------------------|----------------------|
| IL-1 $\beta$   | GAGCCCATCCTCTGTGACTC      | TCCATTGAGGTGGAGAGCTT |
| IL-10          | CAGCCGGGAAGACAATAACT      | TCATTCCGATAAGGCTTGG  |
| TGF $\beta$    | CCTGCAAGACCATCGACATG      | TGTTGTACAAAGCGAGCACC |
| TNF $\alpha$   | ACGGCATGGATCTCAAAGAC      | AGATAGCAAATCGGCTGACG |
| $\beta$ -actin | CATCCGTAAAGACCTCTATGCCAAC | ATGGAGCCACCGATCCACA  |

**Supplementary Table 2. Human primers of cytokines**

|                | Forward primer       | Reverse primer        |
|----------------|----------------------|-----------------------|
| IL-1 $\alpha$  | TCAAGGAGAGCATGGTGGTA | GTGCTGACCTAGGCTTGATG  |
| IL-1 $\beta$   | AGCTCGCCAGTGAAATGATG | CGGAGATTCGTAGCTGGATG  |
| IL-2           | AACCTCTGGAGGAAGTGCTA | AATGGTTGCTGTCTCATCAGC |
| IL-10          | CCTGCCTAACATGCTTCGAG | GTCTTGGTTCTCAGCTTGGG  |
| TGF $\beta$    | GACTCGCCAGAGTGGTTATC | GGTAGTGAACCCGTTGATGT  |
| TNF $\alpha$   | ATCATCTTCTCGAACCCCGA | GTTATCTCTCAGCTCCACGC  |
| $\beta$ -actin | TGACGGGGTCACCCACACTG | AAGCTGTAGCCGCGCTCGGT  |

**Supplementary Table 3. Alignment results of *L. paracasei***

| Subject acc.                                                                                                    | % identity | Alignment length | Mismatches | Q. start | Q. end  | S. start | S. end | E value  | Bit score |
|-----------------------------------------------------------------------------------------------------------------|------------|------------------|------------|----------|---------|----------|--------|----------|-----------|
| <i>Lactobacillus paracasei</i> strain R094<br>16S ribosomal RNA gene,<br>partial sequence                       | 100        | 1522             | 0          | 999528   | 1001049 | 1522     | 1      | 0        | 2811      |
|                                                                                                                 | 99.934     | 1522             | 1          | 2389192  | 2390713 | 1        | 1522   | 0        | 2806      |
|                                                                                                                 | 99.869     | 1522             | 2          | 1668500  | 1670021 | 1522     | 1      | 0        | 2800      |
|                                                                                                                 | 99.869     | 1522             | 2          | 3051581  | 3053102 | 1        | 1522   | 0        | 2800      |
|                                                                                                                 | 100        | 1326             | 0          | 1        | 1326    | 197      | 1522   | 0        | 2449      |
|                                                                                                                 | 98.98      | 196              | 2          | 3070945  | 3071140 | 1        | 196    | 1.00E-92 | 351       |
| <i>Lactobacillus paracasei</i> strain NBRC 15889<br>16S ribosomal RNA gene,<br>partial sequence                 | 99.933     | 1495             | 1          | 999555   | 1001049 | 1495     | 1      | 0        | 2758      |
|                                                                                                                 | 99.866     | 1495             | 2          | 2389192  | 2390686 | 1        | 1495   | 0        | 2752      |
|                                                                                                                 | 99.799     | 1495             | 3          | 1668527  | 1670021 | 1495     | 1      | 0        | 2747      |
|                                                                                                                 | 99.799     | 1495             | 3          | 3051581  | 3053075 | 1        | 1495   | 0        | 2747      |
|                                                                                                                 | 99.923     | 1299             | 1          | 1        | 1299    | 197      | 1495   | 0        | 2396      |
|                                                                                                                 | 98.98      | 196              | 2          | 3070945  | 3071140 | 1        | 196    | 1.00E-92 | 351       |
| <i>Lactobacillus paracasei</i> subsp. tolerans strain NBRC 15906<br>16S ribosomal RNA gene,<br>partial sequence | 99.866     | 1496             | 0          | 999555   | 1001048 | 1497     | 2      | 0        | 2750      |
|                                                                                                                 | 99.799     | 1496             | 1          | 2389193  | 2390686 | 2        | 1497   | 0        | 2745      |
|                                                                                                                 | 99.733     | 1496             | 2          | 1668527  | 1670020 | 1497     | 2      | 0        | 2739      |
|                                                                                                                 | 99.733     | 1496             | 2          | 3051582  | 3053075 | 2        | 1497   | 0        | 2739      |
|                                                                                                                 | 99.846     | 1301             | 0          | 1        | 1299    | 197      | 1497   | 0        | 2390      |
|                                                                                                                 | 98.974     | 195              | 2          | 3070946  | 3071140 | 2        | 196    | 3.60E-92 | 350       |

|                                                                                                              |        |      |   |         |         |      |      |          |      |
|--------------------------------------------------------------------------------------------------------------|--------|------|---|---------|---------|------|------|----------|------|
| <i>Lactobacillus</i><br><i>paracasei</i> strain<br>ATCC 25302 16S<br>ribosomal RNA gene,<br>partial sequence | 99.792 | 1442 | 1 | 999587  | 1001027 | 1441 | 1    | 0        | 2645 |
|                                                                                                              | 99.723 | 1442 | 2 | 2389214 | 2390654 | 1    | 1441 | 0        | 2639 |
|                                                                                                              | 99.653 | 1442 | 3 | 1668559 | 1669999 | 1441 | 1    | 0        | 2634 |
|                                                                                                              | 99.653 | 1442 | 3 | 3051603 | 3053043 | 1    | 1441 | 0        | 2634 |
|                                                                                                              | 99.921 | 1267 | 1 | 1       | 1267    | 175  | 1441 | 0        | 2335 |
|                                                                                                              | 97.714 | 175  | 2 | 3070967 | 3071140 | 1    | 174  | 3.67E-77 | 300  |

**Supplementary Fig. 1. Effects of LpEVs on *E.coli* EV-induced inflammatory responses in murine macrophages**

(a) Cytotoxicity of RAW 264.7 cells (b) TNF $\alpha$  secretion (c) NO production (N=3 for each experimental group). \* $P$ <0.01 compared with vehicle-treated control cells. # $P$ <0.01 compared with LPS-treated cells without LpEVs.

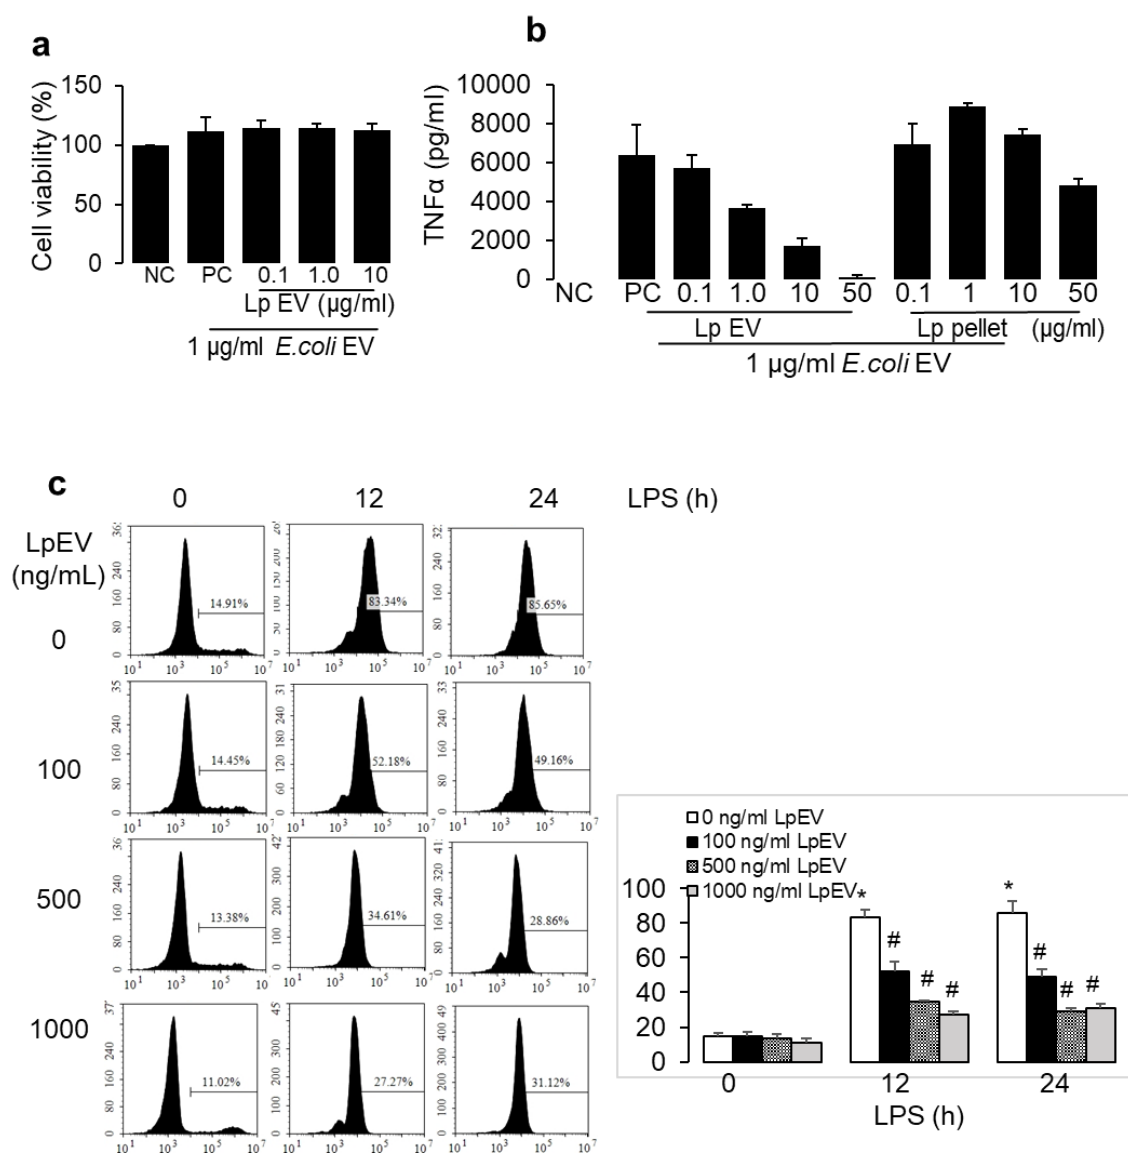

Supplement: 12276_2019_359_MOESM1_ESM.pdf [file 12276_2019_359_MOESM1_ESM.pdf]
